# Supplementary material for: Diethylenetriamine-mediated self-assembly of three-dimensional hierarchical nanoporous CoP nanoflowers/pristine graphene interconnected networks as efficient electrocatalysts toward hydrogen evolution
Source: Royal Society of Chemistry journal article supplement (doi:10.1039/c7se00454k), 2017-01-01
Supplement: c7se00454k1.pdf [file c7se00454k1.pdf]

## Electronic Supplementary Information

### Diethylenetriamine-mediated self-assembly of three-dimensional hierarchical nanoporous CoP nanoflowers/pristine graphene interconnected network as efficient electrocatalysts toward hydrogen evolution

Xiuling Fan,<sup>ab</sup> Xiaoyan Wang,<sup>ab</sup> Weiyong Yuan<sup>\*ab</sup> and Chang Ming Li<sup>ab</sup>

<sup>a</sup>Institute for Clean energy & Advanced Materials, Faculty of Materials & Energy, Southwest University, Chongqing 400715, China.

<sup>b</sup>Chongqing Key Laboratory for Advanced Materials and Technologies of Clean Energies, Chongqing 400715, China.

\*Corresponding author. E-mail address: yuanweiyong@swu.edu.cn

#### Contents

N<sub>2</sub> adsorption–desorption isotherm and pore size distribution of pristine graphene (Fig. S1).

High-resolution Co 2p<sub>3/2</sub> and P 2p XPS spectra of CoP/CoCO<sub>3</sub>/G (Fig. S2).

FESEM image of the sample synthesized with 0.5 g Co(NO<sub>3</sub>)<sub>2</sub>•6H<sub>2</sub>O (Fig. S3).

LSV curves of 3-D H-NP-CoP NF/G IN using a Pt foil and a graphite rod as the counter electrodes (Fig. S4).

Calculated and measured amount of hydrogen at different times for CoP/BMHNC at –0.25 V for 120 min in 0.5 M H<sub>2</sub>SO<sub>4</sub> (Fig. S5).

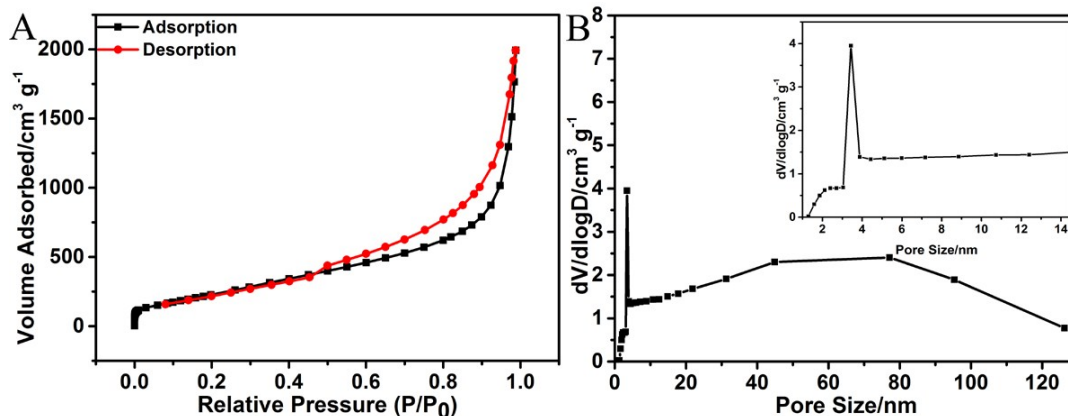

**Fig. S1**  $N_2$  adsorption–desorption isotherm (A) and pore size distribution (B) of pristine graphene.

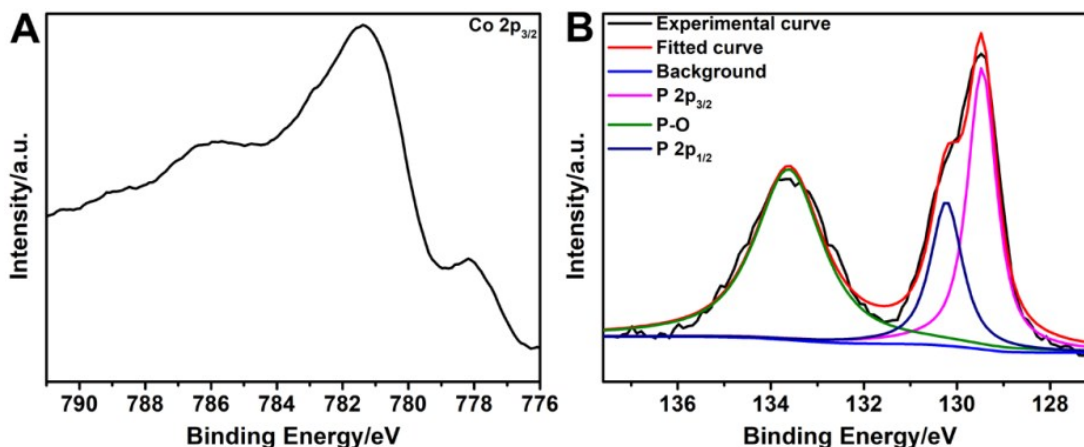

**Fig. S2** High-resolution Co  $2p_{3/2}$  (A) and P  $2p$  (B) XPS spectra of CoP/CoCO<sub>3</sub>/G. The high-resolution Co  $2p_{3/2}$  spectrum shows three peaks at 778.3, 781.4, and 786.1 eV, whereas the P  $2p$  spectrum exhibits three peaks at 129.5 (P  $2p_{3/2}$ ), 130.2 (P  $2p_{1/2}$ ), and 133.6 eV. The peaks at 778.3 and 129.5 eV are close to the binding energies of Co and P in CoP, indicating the formation of CoP. The peaks at 781.4 and 786.1 correspond to oxidized states of Co, which arise from surface oxidation of CoP by the O<sub>2</sub> in air and/or Co<sup>2+</sup> in CoCO<sub>3</sub>. The peak at 133.8 eV corresponds to the oxidized state of P, which is caused by surface oxidation of CoP by the O<sub>2</sub> in air.

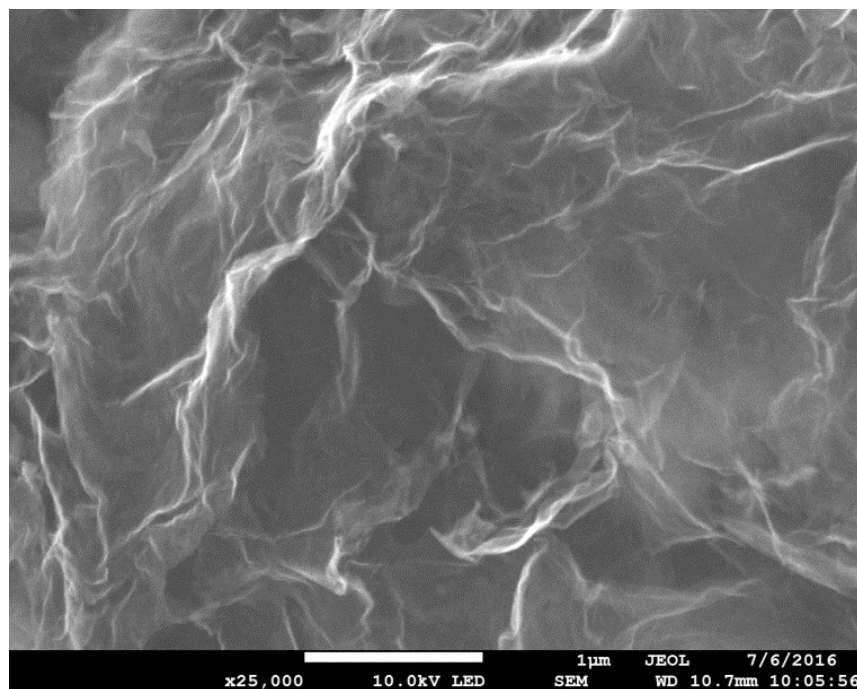

Fig. S3 FESEM image of the sample synthesized with 0.5 g  $\text{Co}(\text{NO}_3)_2 \cdot 6\text{H}_2\text{O}$ .

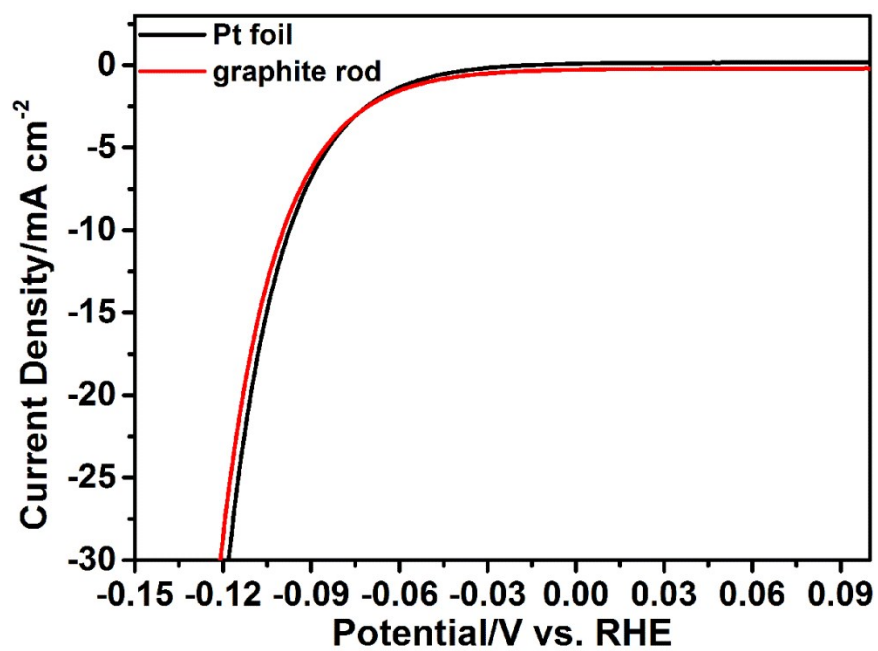

Fig. S4 LSV curves of 3-D H-NP-CoP NF/G IN using a Pt foil and a graphite rod as the counter electrodes.

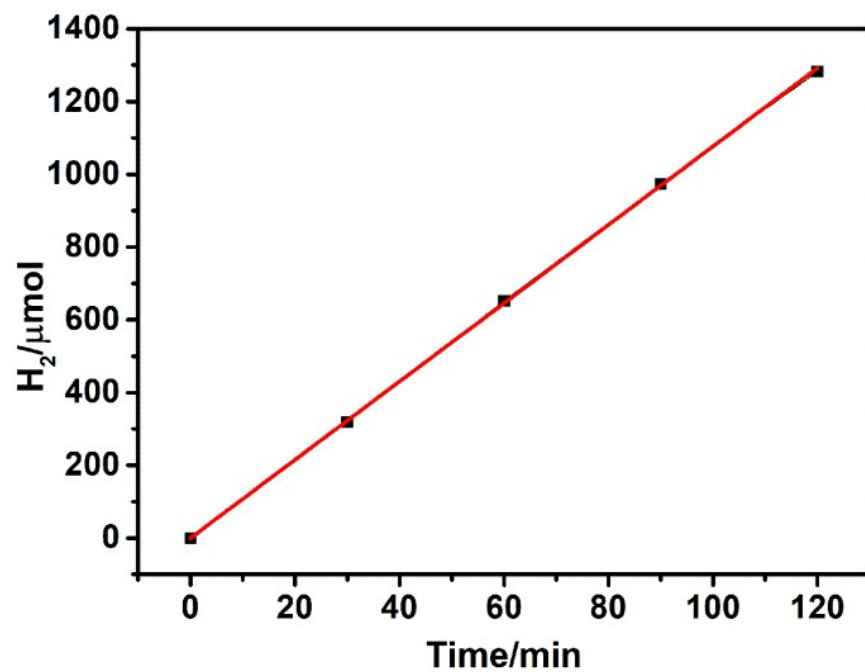

**Fig. S5** Calculated (red line) and measured (black dot) amount of hydrogen at different times for CoP/BMHNC at  $-0.15$  V for 120 min in  $0.5$  M  $H_2SO_4$ .
